# Supplementary material for: Ultraviolet-B Irradiation Increases Antioxidant Capacity of Pakchoi (Brassica rapa L.) by Inducing Flavonoid Biosynthesis
Source: MDPI journal article supplement (doi:10.3390/plants11060766), 2022-03-13
Supplement: s1 [file s1]

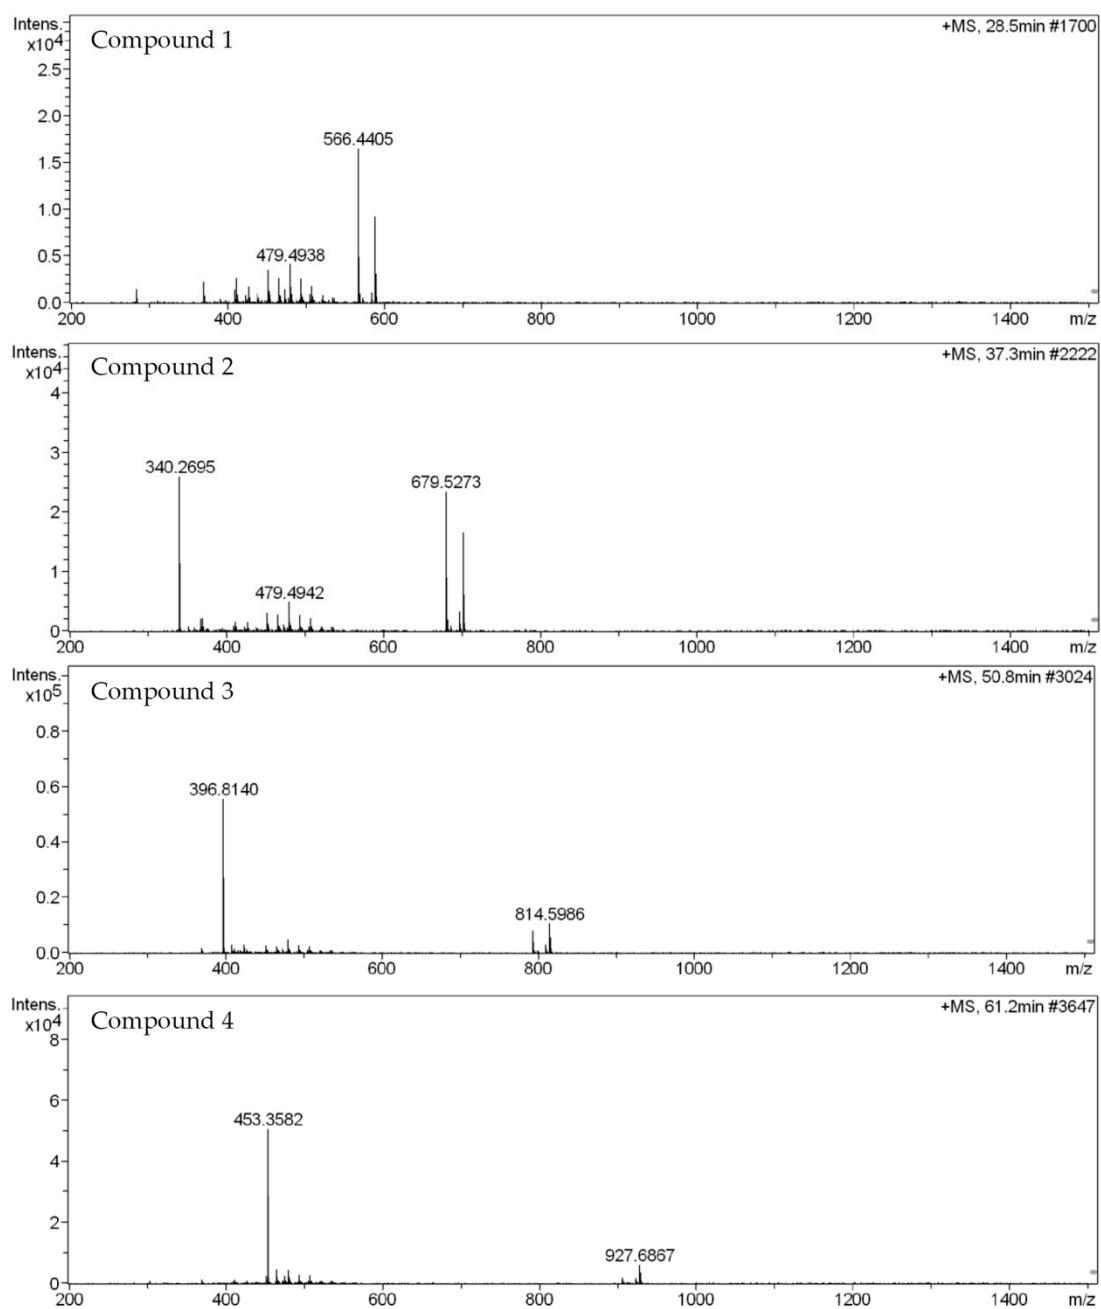

**Figure S1.** Mass spectrometric analysis of the flavonoids which increased in response to  $4 \mu\text{mol}\cdot\text{m}^{-2}\cdot\text{s}^{-1}$  UV-B radiation for 4 h.

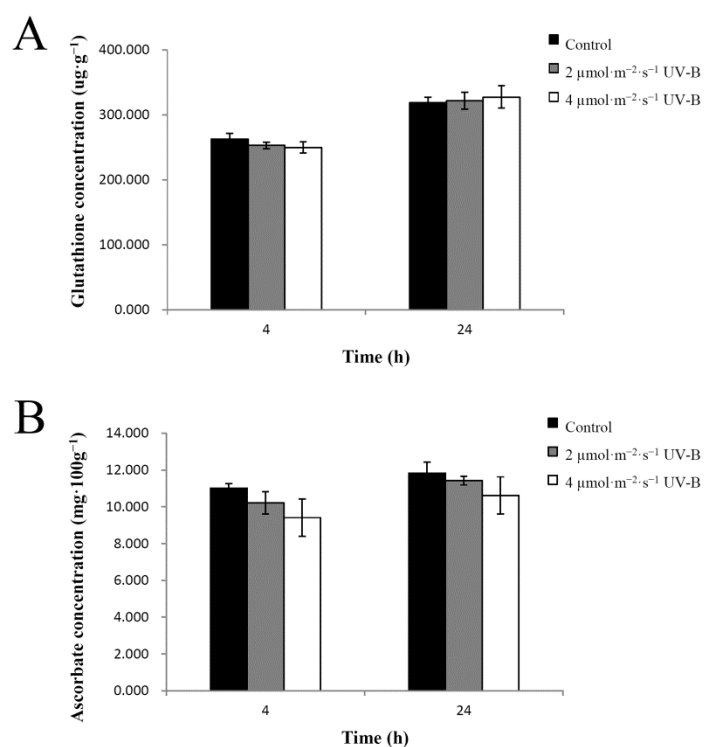

**Figure S2.** The effect of UV-B radiation on the antioxidant concentrations of pakchoi. **(A)** The glutathione concentration of 25-day-old seedlings treated with either dosage (2  $\mu\text{mol}\cdot\text{m}^{-2}\cdot\text{s}^{-1}$  or 4  $\mu\text{mol}\cdot\text{m}^{-2}\cdot\text{s}^{-1}$ ) of UV-B radiation at 4 h or 24 h. **(B)** The ascorbate concentration of 25-day-old seedlings treated with either dosage (2  $\mu\text{mol}\cdot\text{m}^{-2}\cdot\text{s}^{-1}$  or 4  $\mu\text{mol}\cdot\text{m}^{-2}\cdot\text{s}^{-1}$ ) of UV-B radiation at 4 h or 24 h. The plants without UV-B radiation served as controls. Three biologically independent replicate experiments were performed; data points represent the mean  $\pm$  SE of three biological replicates. Asterisks indicate a significant difference ( $*P<0.05$ ;  $**P<0.01$ ) relative to the corresponding control, using Student's *t*-test.

**Table S1.** Gradient elution program for HPLC analysis.

| Time (min) | Mobile phase A | Mobile phase B |
|------------|----------------|----------------|
| 0–8        | 95%–90%        | 5%–10%         |
| 8–15       | 90%–90%        | 10%–10%        |
| 15–26      | 90%–87%        | 10%–13%        |
| 26–35      | 87%–85%        | 13%–15%        |
| 35–40      | 85%–85%        | 15%–15%        |
| 40–45      | 85%–80%        | 15%–00%        |
| 45–55      | 80%–95%        | 15%–5%         |

**Table S2.** Primers used in quantitative reverse transcription PCR (qRT-PCR).

| <b>Gene</b>     | <b>Forward primers (5'-3')</b> | <b>Reverse primers (5'-3')</b> |
|-----------------|--------------------------------|--------------------------------|
| <i>BrActin2</i> | ATGCTCCCAGGGCTGTTTTC           | CCTCTTTTGGACTGTGCTTCG          |
| <i>BrPAL</i>    | ATGTTTCTTTCGTGCTGCCG           | GGTTTGGTGCTACTTCTCATCG         |
| <i>BrC4H</i>    | AGCCAACCTGCTCCTCTCTCC          | AAGAACCCTGACTCCGCCAC           |
| <i>Br4CL</i>    | TGTGAAACATCGGGAGGAAAC          | CGGGACTTCCAAAAGGTGTG           |
| <i>BrCHS</i>    | CAAAGAGGCGGCAGTGAAGG           | AGACGCTTGACGGAAGGACG           |
| <i>BrCHI</i>    | CTTTCCTCCTGGTGCTTCG            | AATCTCTCGGCAAGACTCAACC         |
| <i>BrF3H</i>    | CTCACTTTAAGCGGATACACGG         | CACTATCTGAGCAACGGGAGGT         |
| <i>BrF3'H</i>   | CGATGTGTGGTAACGAGAGTGG         | CGGAGATAATGAGAAAAGCCC          |
| <i>BrFLS</i>    | ACATCGAAGGGTACGGAACG           | TTAACGCACGACGGTGGC             |
| <i>BrDFR</i>    | CCAAGAAGCTGATTGATATGGG         | CGGTAAAGTGAAGGGAGAAAACC        |
| <i>BrANS</i>    | GGTGGTTCACAAAACACAGCC          | TGGAGATTCTTAGTAACGGGAGG        |
| <i>BrLDOX</i>   | TAGCACTTGCGTGGAAGC             | TGACCCATTTGCCCTCGTAG           |
| <i>BrUFGT</i>   | GTATCCGTTGCTCCTCCAGTG          | GGGGAAGCCAATGAGACAGAAG         |
